# Supplementary material for: A genome-wide association study of folates in sweet corn kernels
Source: Frontiers journal article supplement (doi:10.3389/fpls.2022.1004455), 2022-09-30
Supplement: Data_Sheet_1.zip [file Data_Sheet_1.zip]

## Sheet: Sheet1
Table S2. SNPs and candidate genes significantly associated with folate traits
Trait	Marker	Chromosome	Positona	Alleleb	MAFc	P-Value	(R2)d	Candidate gene	Annotation
5-FTHF	S1_31557582	1	31557582	C/G	0.0599078	2.3844e-08	0.1494	Zm00001d028349	Peroxidase 59
5-FTHF	S1_33733788	1	33733788	A/G	0.0645161	1.1657e-07	0.13364	Zm00001d028404	Chaperone protein dnaJ
5-FTHF	S1_50189567	1	50189567	C/T	0.0502513	3.929e-07	0.12934	Zm00001d028901	high chlorophyll fluorescence
5-FTHF	S1_54089889	1	54089889	T/C	0.0509259	4.9205e-07	0.07793	No
5-FTHF	S1_61354126	1	61354126	T/C	0.0841121	2.1608e-07	0.12815	Zm00001d029181	Unknown
Total folate	S1_96611542	1	96611542	C/T	0.0995025	3.6581e-07	0.13473	Zm00001d029964	Unknown
DHF	S1_133325858	1	133325858	C/T	0.0990099	3.4281e-07	0.13686	No
5-FTHF	S1_160480887	1	160480887	A/G	0.0651163	6.2126e-07	0.0767	No
5-FTHF	S1_161821452	1	161821452	A/G	0.0753769	4.4115e-07	0.0824	No
Ratio(5,10-CH=THF/5-FTHF)	S1_165424912	1	165424912	C/T	0.0798122	2.0228e-07	0.13512	No
Ratio(DHF/THF)	S1_177585636	1	177585636	A/G	0.052381	6.676e-07	0.12476	Zm00001d031109	C2C2-YABBY-transcription factor 11
DHF	S1_177585636	1	177585636	A/G	0.0521327	1.5709e-07	0.13927	Zm00001d031109	C2C2-YABBY-transcription factor 11
5-FTHF	S1_178565549	1	178565549	C/T	0.0670103	3.6798e-07	0.14699	Zm00001d031126	Unknown
5-FTHF	S1_180276325	1	180276325	G/C	0.11215	9.3306e-07	0.11619	Zm00001d031161	Unknown
5-FTHF	S1_193233746	1	193233746	G/A	0.0787037	3.0332e-07	0.12449	Zm00001d031532	myosin heavy chain-related
5-FTHF	S1_241572861	1	241572861	A/G	0.0654206	6.2894e-07	0.07782	Zm00001d022945	lincRNA
5-FTHF	S1_246047215	1	246047215	G/C	0.0582011	9.8642e-07	0.08684	Zm00001d032991	F-box/kelch-repeat protein
THF	S1_246656421	1	246656421	C/T	0.0755556	3.417e-07	0.12369	Zm00001d033004	Protein kinase
Ratio(DHF/THF)	S1_303857887	1	303857887	C/T	0.06	2.5978e-07	0.13581	Zm00001d034855	Basic transcription factor 3
Ratio(DHF/THF)	S2_370059	2	370059	C/T	0.0688073	2.203e-08	0.1576	Zm00001d001769	E3 ubiquitin-protein ligase PUB23
DHF	S2_370059	2	370059	C/T	0.0684932	1.3335e-07	0.13811	Zm00001d001769	E3 ubiquitin-protein ligase PUB23
DHF	S2_3093831	2	3093831	T/C	0.0909091	2.9073e-07	0.12979	Zm00001d001932	Probable plastid-lipid-associated protein
Ratio(DHF/THF)	S2_4133879	2	4133879	G/C	0.0648148	1.6972e-07	0.13632	Zm00001d001997	Unknown
DHF	S2_4133879	2	4133879	C/G	0.0645161	9.3923e-07	0.11836	Zm00001d001997	Unknown
5-FTHF	S2_9832141	2	9832141	G/T	0.0509259	6.0516e-07	0.11778	Zm00001d002305	AP-3 complex subunit mu
Ratio(5,10-CH=THF/5-FTHF)	S2_10420963	2	10420963	G/A	0.0651163	5.464e-07	0.12514	Zm00001d002328	Probable inactive purple acid phosphatase
Ratio(DHF/THF)	S2_69899086	2	69899086	C/G	0.114155	3.9922e-07	0.12721	No
DHF	S2_69899086	2	69899086	C/G	0.113636	4.037e-07	0.12647	No
Ratio(5,10-CH=THF/5-FTHF)	S2_86369066	2	86369066	A/C	0.0576923	1.1102e-07	0.14192	Zm00001d004147	Unknown
Ratio(DHF/THF)	S2_105401308	2	105401308	C/T	0.057971	3.9934e-07	0.13002	No
5,10-CH=THF	S2_205444893	2	205444893	A/G	0.0803571	6.8596e-07	0.11936	Zm00001d006354	Unknown
THF	S2_211745047	2	211745047	T/G	0.0711111	9.6597e-07	0.11362	Zm00001d006591	F-box domain containing protein
5-FTHF	S2_243950770	2	243950770	A/G	0.0691244	4.9367e-07	0.11956	Zm00001d007951	CK2 protein kinase alpha 1
Ratio(DHF/THF)	S3_49242066	3	49242066	A/G	0.0518868	3.0578e-08	0.15714	No
Ratio(DHF/THF)	S3_110458943	3	110458943	A/G	0.109524	8.3232e-07	0.12265	Zm00001d041287	Unknown
DHF	S3_110458943	3	110458943	G/A	0.109005	9.6028e-07	0.12013	Zm00001d041287	Unknown
DHF	S3_138468746	3	138468746	C/G	0.0772727	2.1239e-08	0.15669	Zm00001d041796	Unknown
5-FTHF	S3_181142828	3	181142828	C/T	0.0552995	7.2568e-07	0.07553	Zm00001d042821	WUSCHEL-homeobox-transcription factor 5b
Ratio(DHF/THF)	S3_186220703	3	186220703	A/G	0.0555556	7.3003e-07	0.14659	Zm00001d042999	TRF-like 10
DHF	S3_186220703	3	186220703	G/A	0.0555556	4.2361e-08	0.18253	Zm00001d042999	TRF-like 10
Ratio(5,10-CH=THF/5-FTHF)	S3_219824778	3	219824778	G/A	0.0509259	2.078e-07	0.1339	Zm00001d044120	Sterol 14-demethylase
Ratio(5,10-CH=THF/5-FTHF)	S3_234080870	3	234080870	G/C	0.0509259	2.2003e-08	0.15718	Zm00001d044652	nucleotide sugar transporter-KT 1
Ratio(DHF/THF)	S4_4326126	4	4326126	G/C	0.158879	7.8898e-07	0.12135	Zm00001d048729	Uncharacterized protein
Ratio(5,10-CH=THF/5-FTHF)	S4_5756171	4	5756171	C/G	0.0703518	2.5429e-07	0.15235	Zm00001d048801	Protein ELF4-LIKE 4
5-FTHF	S4_11472240	4	11472240	T/C	0.0560748	4.959e-07	0.07892	Zm00001d048983	Uncharacterized protein
5-FTHF	S4_52651838	4	52651838	G/T	0.125581	3.3872e-07	0.12379	Zm00001d026811	lincRNA
DHF	S4_81942661	4	81942661	C/T	0.0651163	7.7816e-07	0.12024	Zm00001d050335	Cation efflux family protein
DHF	S4_137674117	4	137674117	A/C	0.0518868	7.5769e-07	0.13198	Zm00001d051029	Unknown
Ratio(DHF/THF)	S4_179431728	4	179431728	C/T	0.0594059	5.7953e-07	0.1428	Zm00001d052095	Unknown
DHF	S4_179431728	4	179431728	C/T	0.0591133	9.2987e-08	0.16115	Zm00001d052095	Unknown
5-FTHF	S4_208653537	4	208653537	T/C	0.0599078	8.4208e-07	0.1144	Zm00001d053004	Auxin transporter-like protein 3
5-FTHF	S4_221667027	4	221667027	C/T	0.0552995	1.7774e-07	0.1295	Zm00001d053242	Nuclear pore complex protein NUP214
Ratio(5,10-CH=THF/5-FTHF)	S4_231324979	4	231324979	A/G	0.0576923	7.35e-07	0.12379	Zm00001d053435	Putative RING zinc finger domain superfamily protein
Total folate	S4_244491708	4	244491708	G/A	0.116402	7.0787e-07	0.13215	Zm00001d053972	DNAJ heat shock family protein
DHF	S5_2883734	5	2883734	A/G	0.101852	2.8914e-07	0.13073	Zm00001d012995	Unknown
5-FTHF	S5_20162982	5	20162982	T/C	0.308057	3.6511e-14	0.30117	Zm00001d013786	5-formyltetrahydrofolate cyclo-ligase
5-FTHF	S5_53461463	5	53461463	A/G	0.0648148	4.3786e-07	0.12104	Zm00001d014564	oxygen-evolving complex 33 kda protein b
THF	S5_65205951	5	65205951	A/T	0.0723982	1.7918e-07	0.13112	Zm00001d014844	starch branching enzyme1
5-FTHF	S5_83240803	5	83240803	C/T	0.0575916	8.674e-07	0.08894	Zm00001d015298	Tyrosine-sulfated glycopeptide receptor 1
Ratio(DHF/THF)	S5_86680491	5	86680491	T/G	0.079096	5.6949e-07	0.13757	No
5-FTHF	S5_172227468	5	172227468	T/C	0.0875576	6.1578e-07	0.11742	Zm00001d016675	Serine/threonine-protein kinase CTR1
Ratio(5,10-CH=THF/5-FTHF)	S5_178197944	5	178197944	T/C	0.0837209	2.5271e-07	0.13252	Zm00001d016841	monooxygenase 1
5-FTHF	S5_188113906	5	188113906	C/T	0.165049	6.9318e-07	0.11807	Zm00001d017177	Serine/arginine-rich splicing factor RSZ22
Ratio(DHF/THF)	S6_7251161	6	7251161	G/A	0.0724638	1.4941e-07	0.14173	Zm00001d035157	Lysine histidine transporter 2
DHF	S6_7251161	6	7251161	A/G	0.0724638	6.1833e-08	0.15409	Zm00001d035157	Lysine histidine transporter 2
5-FTHF	S6_7395138	6	7395138	G/A	0.0947867	6.2924e-07	0.11898	Zm00001d035161	Lysine histidine transporter
5-FTHF	S6_18618393	6	18618393	T/C	0.0697674	9.6644e-08	0.13609	No
5-FTHF	S6_58267630	6	58267630	A/G	0.056872	5.0632e-07	0.12129	Zm00001d035877	Condensin-2 complex subunit H2
5-FTHF	S6_97856463	6	97856463	A/T	0.0813397	2.4001e-07	0.13483	Zm00001d036693	WAPL (Wings apart-like protein regulation of heterochromatin) protein
5-FTHF	S6_145772988	6	145772988	A/G	0.117949	8.4614e-08	0.14863	Zm00001d038035	ADPATP carrier protein 1 chloroplastic
Ratio(DHF/THF)	S6_157094569	6	157094569	C/G	0.0710059	5.3613e-07	0.14891	Zm00001d038427	Leucine-rich repeat protein kinase family protein
5-MTHF	S6_160666250	6	160666250	G/A	0.0666667	2.6913e-07	0.12819	Zm00001d038595	myosin heavy chain-related
Total folate	S6_160666250	6	160666250	G/A	0.0735294	2.7805e-07	0.13518	Zm00001d038595	myosin heavy chain-related
Total folate	S6_161309956	6	161309956	T/G	0.0588235	7.337e-07	0.12498	Zm00001d038630	Sphinganine C4-monooxygenase 1
DHF	S6_169557641	6	169557641	A/G	0.078341	3.3526e-07	0.12903	Zm00001d039073	Unknown
5-FTHF	S7_96793416	7	96793416	A/G	0.0663507	7.2447e-07	0.07686	No
5-MTHF	S7_116723176	7	116723176	G/A	0.0588235	8.6422e-09	0.16649	No
Total folate	S7_148073043	7	148073043	C/T	0.0689655	4.6509e-07	0.12984	Zm00001d021291	Two-component response regulator-like APRR9
Ratio(DHF/THF)	S7_162996440	7	162996440	T/A	0.0509259	7.7599e-07	0.12491	Zm00001d021787	Sphingosine kinase 1
Ratio(5,10-CH=THF/5-FTHF)	S7_173395936	7	173395936	G/C	0.218605	1.0918e-07	0.14052	Zm00001d022238	Transmembrane emp24 domain-containing protein p24delta9
Ratio(5,10-CH=THF/5-FTHF)	S7_175753413	7	175753413	T/C	0.0509259	3.4797e-07	0.12864	Zm00001d022340	Uncharacterized protein
Ratio(5,10-CH=THF/5-FTHF)	S8_11727262	8	11727262	T/G	0.0697674	9.3266e-07	0.11893	Zm00001d008526	Glycosyltransferase family 61 protein
5-FTHF	S8_15950291	8	15950291	C/T	0.0663507	9.1943e-07	0.07579	Zm00001d008651	Pyruvate decarboxylase2
DHF	S8_44862699	8	44862699	C/T	0.0682927	2.5572e-07	0.14757	No
Ratio(5,10-CH=THF/5-FTHF)	S8_161247118	8	161247118	G/A	0.0509259	8.6753e-08	0.14289	Zm00001d011767	DnaJ subfamily C member 7
DHF	S8_174476197	8	174476197	C/T	0.129032	5.6702e-07	0.12444	Zm00001d012438	ABC transporter G family member 6
5-FTHF	S8_175594171	8	175594171	A/T	0.078341	2.4598e-07	0.12633	Zm00001d012507	WRKY-transcription factor 88
Total folate	S9_110941298	9	110941298	A/C	0.103448	2.04e-07	0.1385	Zm00001d046923	D-3-phosphoglycerate dehydrogenase 2 chloroplastic
5-FTHF	S9_154803924	9	154803924	C/G	0.0506912	2.7132e-07	0.12537	Zm00001d048344	Expansin-like A2
5-FTHF	S10_2310089	10	2310089	C/T	0.09	6.0747e-07	0.08782	Zm00001d023296	Ferredoxin--NADP reductase leaf isozyme 1 chloroplastic
Ratio(5,10-CH=THF/5-FTHF)	S10_103657961	10	103657961	G/A	0.0724638	3.9544e-07	0.12987	Zm00001d025093	TTF-type zinc finger protein with HAT dimerisation domain
5-MTHF	S10_131525465	10	131525465	T/C	0.126697	5.8252e-07	0.12351	Zm00001d025853	Putative casein kinase family protein
Ratio(DHF/THF)	S10_149171639	10	149171639	C/T	0.0721154	3.3022e-07	0.13121	Zm00001d026627	Transducin/WD40 repeat-like superfamily protein
DHF	S10_149171639	10	149171639	T/C	0.0717703	6.2639e-07	0.12424	Zm00001d026627	Transducin/WD40 repeat-like superfamily protein
Ratio(DHF/THF)	S10_149448020	10	149448020	T/A	0.121495	5.4478e-08	0.14816	Zm00001d026653	BR-signaling kinase 3
Ratio(DHF/THF)	S10_149524022	10	149524022	T/A	0.0547945	2.4265e-08	0.15608	Zm00001d026657	Probable CCR4-associated factor 1 homolog 11
a Physical position of leading SNP according to AGPv4.
b Major allele, minor allele; underlined bases are the favorable alleles.
c MAF, minor allele frequency
d R2, the phenotypic variance explained by each SNP.
